# Supplementary material for: Identify Key Determinants of Contraceptive Use for Sexually Active Young People: A Hybrid Ensemble of Machine Learning Methods
Source: Children (Basel). 2021 Oct 26;8(11):968. doi: 10.3390/children8110968 (PMC8622295; doi:10.3390/children8110968)
Supplement: Supplementary file 1 [file children-08-00968-s001.zip › children-1395986-supplementary.pdf]

## Supplementary Materials

### Detailed information about the included variables

We included 25 potential variables across 8 domains (**Table 1**): *education-related factors, socio-economics, attitudes towards sexuality, sexual health knowledge, sexual and mental health history, contraceptive accessibility, family-related factors, and lifestyles*. Most of the included variables were continuous or categorical variables. Notably, for measuring the participants' attitudes towards sexuality, the survey asked 12 designed questions (**Table 2**). A 12-dimension vector containing the responses to these 12 questions was obtained for each participant. Later, a hierarchical clustering analysis was applied on the vectors to assign the participants into 3 sub-groups, using Euclidean distance as the distance metric and adopting the complete-linkage criteria. The label attained by clustering analysis for each participant indicated the sub-group that the participant was belonged to, and the sub-groups with different labels were assumed to be different (holding different mixtures of attitudes) from each other. The label was later used as a predictor for model training to validate the effects of internal factors on contraceptive behaviors. Participants' sexual health knowledge levels were quantitatively measured by a short Sexual Reproductive Health (SRH) quiz containing 9 questions (**Table 3**). The quiz included topics on contraception, HIV/AIDS, pregnancy/abortion. The score for the quiz ranged from 0 to 9, corresponding to the number of correct answers attained. In the domain of *sexual and mental health history*, the depression status for each participant was measured by the 10-item Centre for Epidemiological Studies Depression Scale (CES-D-10), a self-report depression scale for research in the general population. There was also an indicator encoded as a binary variable documenting each participant's sexual harassment history (0 - no harassment; 1 - experienced harassment). This indicator was transformed based on a series of questions asking about sexual harassment experience (**Table 4**). A participant was considered to be sexually harassed before if any confirmative answer to such questions was reported.

**Table S1.** Included covariates for identifying key determinants associated with young people's frequency of contraceptive use (FCU)

| Variable name                    | Description                                                     | Original/<br>Composite <sup>a</sup> | Number<br>of source<br>questions<br>in the<br>survey | Variable<br>type      | Value/Range                                                                                                                                                                                                                                                                         |
|----------------------------------|-----------------------------------------------------------------|-------------------------------------|------------------------------------------------------|-----------------------|-------------------------------------------------------------------------------------------------------------------------------------------------------------------------------------------------------------------------------------------------------------------------------------|
| <i>Education-related factors</i> |                                                                 |                                     |                                                      |                       |                                                                                                                                                                                                                                                                                     |
| School location                  | The school's location                                           | Original                            | 1                                                    | Categorical           | West - 1; Middle - 2; East - 3                                                                                                                                                                                                                                                      |
| School type                      | The school type (university or vocational school)               | Original                            | 1                                                    | Categorical           | University (College) - 0; Vocational School - 1                                                                                                                                                                                                                                     |
| Educational level (degree)       | The participants' educational level                             | Original                            | 1                                                    | Categorical (ordinal) | Associate - 1; Bachelor - 2; Master - 3; Ph.D. - 4                                                                                                                                                                                                                                  |
| Undergraduate/Graduate student   | Whether the participant is an undergraduate or graduate student | Original                            | 1                                                    | Categorical           | Graduate - 0; Undergraduate - 1                                                                                                                                                                                                                                                     |
| Enrollment year                  | The participant's enrollment year                               | Original                            | 1                                                    | Continuous            | -4 ~ 4 (integer) corresponding to enrollment year in 2011 ~ 2019                                                                                                                                                                                                                    |
| <i>Socio-economics</i>           |                                                                 |                                     |                                                      |                       |                                                                                                                                                                                                                                                                                     |
| Sex                              | Sex of the participant                                          | Original                            | 1                                                    | Categorical           | Female - 0; Male - 1                                                                                                                                                                                                                                                                |
| Age                              | Age of the participant                                          | Original                            | 1                                                    | Continuous            | 15 ~ 29 (integer) years old                                                                                                                                                                                                                                                         |
| Attitude towards marriage        | The participant's attitudes towards marriage                    | Original                            | 1                                                    | Categorical           | Must get married anyway - 1;<br>Get married if there is a suitable partner, otherwise it is OK not to get married - 2;<br>Do not want to get married, but can live with girl/boyfriends for a long time - 3;<br>Do not want to get married, would rather be single all the time - 4 |

| Variable name                           | Description                                                             | Original/<br>Composite <sup>a</sup> | Number<br>of source<br>questions<br>in the<br>survey | Variable<br>type         | Value/Range                                                                                                                                    |
|-----------------------------------------|-------------------------------------------------------------------------|-------------------------------------|------------------------------------------------------|--------------------------|------------------------------------------------------------------------------------------------------------------------------------------------|
| Monthly expenditure                     | The participant's monthly expenditure                                   | Original                            | 1                                                    | Categorical<br>(ordinal) | < 1500 CNY - 1;<br>1500 ~ 2500 CNY - 2;<br>>2500 CNY - 3                                                                                       |
| Romantic Relationship                   | Whether the participant had a romantic relationship                     | Original                            | 1                                                    | Categorical              | Never have a boyfriend/girlfriend - 1;<br>Have a boyfriend/girlfriend before - 2;<br>Currently have a boyfriend/girlfriend<br>(or married) - 3 |
| <i>Attitudes towards sexuality</i>      |                                                                         |                                     |                                                      |                          |                                                                                                                                                |
| Attitude towards sexuality              | The participant's attitudes towards sexuality                           | Composite                           | 12                                                   | Categorical              | Cluster 1 - 1;<br>Cluster 2 - 2;<br>Cluster 3 - 3                                                                                              |
| <i>Sexual health knowledge</i>          |                                                                         |                                     |                                                      |                          |                                                                                                                                                |
| SRH-quiz <sup>b</sup> score             | The score obtained by the participant during the SRH quiz of the survey | Composite                           | 9                                                    | Continuous               | 0 ~ 9 (integer) corresponding to the number of correct answers to questions in the SRH quiz                                                    |
| <i>Sexual and mental health history</i> |                                                                         |                                     |                                                      |                          |                                                                                                                                                |
| Sexual harassment                       | Whether the participant experienced sexual harassment                   | Composite                           | 7                                                    | Categorical              | Yes - 1; No - 0                                                                                                                                |
| STD                                     | Whether the participant had sexually transmitted diseases               | Original                            | 1                                                    | Categorical              | Yes - 1; No - 0                                                                                                                                |

| Variable name                      | Description                                                                                                                  | Original/<br>Composite <sup>a</sup> | Number<br>of source<br>questions<br>in the<br>survey | Variable<br>type      | Value/Range                                                                                                                                                                                                                                   |
|------------------------------------|------------------------------------------------------------------------------------------------------------------------------|-------------------------------------|------------------------------------------------------|-----------------------|-----------------------------------------------------------------------------------------------------------------------------------------------------------------------------------------------------------------------------------------------|
| Depression status                  | Whether the participant was depressed according to the CES-D-10 <sup>c</sup> evaluation                                      | Composite                           | 1                                                    | Continuous            | Values were the scores of CES-D-10                                                                                                                                                                                                            |
| <i>Contraceptive accessibility</i> |                                                                                                                              |                                     |                                                      |                       |                                                                                                                                                                                                                                               |
| Convenient Accessibility           | Whether it is convenient for the participant to access contraceptives                                                        | Original                            | 1                                                    | Categorical           | Yes - 1; No - 0                                                                                                                                                                                                                               |
| Free access                        | Whether the participant had free access to contraceptives                                                                    | Original                            | 1                                                    | Categorical           | Yes - 1; No - 0                                                                                                                                                                                                                               |
| Negotiation                        | Whether the participant negotiated on contraception with the sexual partner and who finally made a decision to contraception | Original                            | 1                                                    | Categorical           | self-decision without the involvement of the sexual partner - 1; Both (the participant with the sexual partner) involved in decision - 2; Only decided by the sexual partner- 3; Random decision dependent on the surrounding environment - 4 |
| <i>Family-related factors</i>      |                                                                                                                              |                                     |                                                      |                       |                                                                                                                                                                                                                                               |
| Father's educational level         | The participant's father's educational level                                                                                 | Original                            | 1                                                    | Categorical (ordinal) | Below bachelor's degree - 1; bachelor's degree or equivalent - 2; Above bachelor's degree - 3                                                                                                                                                 |

| Variable name              | Description                                          | Original/<br>Composite <sup>a</sup> | Number<br>of source<br>questions<br>in the<br>survey | Variable<br>type      | Value/Range                                                                                         |
|----------------------------|------------------------------------------------------|-------------------------------------|------------------------------------------------------|-----------------------|-----------------------------------------------------------------------------------------------------|
| Mother's educational level | The participant's mother's educational level         | Original                            | 1                                                    | Categorical (ordinal) | Below bachelor's degree - 1;<br>bachelor's degree or equivalent - 2;<br>Above bachelor's degree - 3 |
| Only-child                 | Whether the participant is an only-child             | Original                            | 1                                                    | Categorical           | Yes - 1; No - 0                                                                                     |
| Hometown Area              | The hometown area where the participant used to live | Original                            | 1                                                    | Categorical           | Rural - 1;<br>Urban - 2;<br>Suburban - 3                                                            |
| Divorced family            | Whether the participant lived in a divorced family   | Original                            | 1                                                    | Categorical           | Yes - 1; No - 0                                                                                     |
| <b>Lifestyles</b>          |                                                      |                                     |                                                      |                       |                                                                                                     |
| Alcohol drinking           | Whether the participant drank alcohol                | Original                            | 1                                                    | Categorical           | Yes - 1; No - 0<br><br>Never - 1;                                                                   |
| Smoking                    | Whether the participant smoked                       | Original                            | 1                                                    | Categorical           | Never smoke - 1; Used to smoke but already gave up - 2; Currently Smoke - 3                         |

*Note.* 25 potential variables (covariates) across 8 domains: *education-related factors, socio-economics, attitudes towards sexuality, sexual health knowledge, sexual and mental health history, contraceptive accessibility, family-related factors, and lifestyles*. The determinants associated with FCU were later selected from these variables.

<sup>a</sup>Original: the values of the variable were taken directly from the dataset without being further re-coded; Composite: the values of the variable were processed before being used for analysis.

<sup>b</sup>SRH quiz: Sexual Reproductive Health quiz embedded in the survey (**Supplementary material**). The quiz contained 9 questions and included topics on contraception, HIV/AIDS, pregnancy/abortion. The score for the quiz ranged from 0 to 9, corresponding to the number of correct answers attained.

<sup>c</sup>CES-D-10: the 10-item Centre for Epidemiological Studies Depression Scale, a self-report depression scale for research in the general population.

**Table S2.** The list of survey questions regarding attitudes towards sexuality

| Number | Questions                                                                                     | Answers            |
|--------|-----------------------------------------------------------------------------------------------|--------------------|
| 1      | Entering the sexually active period makes me feel guilty                                      |                    |
| 2      | Sex education will lead to [earlier] sexual behaviors                                         |                    |
| 3      | Sex education will lead to [more] sexual behaviors                                            |                    |
| 4      | If you have sex before marriage, your married life will be happier in the future              |                    |
| 5      | It is acceptable to have sex for college aged youths                                          | Strongly disagree; |
| 6      | The Internet makes making friends more easily, and it also makes one-night stands more common | Disagree;          |
| 7      | You don't necessarily have to wear a condom every time, if you don't necessarily get "in"     | Not sure;          |
| 8      | An occasional "one-night stand" is not a serious betrayal of love                             | Agree;             |
| 9      | Having multiple sexual partners at the same time is acceptable                                | Strongly agree     |
| 10     | In real society, men still prefer virgins                                                     |                    |
| 11     | Homosexuality is normal                                                                       |                    |
| 12     | I am willing to go to school with classmates infected with HIV                                |                    |

**Table S3.** The list of questions in the SRH quiz

| Number | Questions                                                                                       | Potential answers | Correct answers |
|--------|-------------------------------------------------------------------------------------------------|-------------------|-----------------|
| 1      | Sexual activity about 14 days before menstruation is most likely to cause pregnant              |                   | Yes             |
| 2      | Sperm can normally survive in a woman's body for about 7 days                                   |                   | No              |
| 3      | As long as the timing is accurate, extracorporeal ejaculation can effectively prevent pregnancy |                   | No              |
| 4      | Having sex during a "safe period" can effectively avoid pregnancy                               | Yes;              | No              |
| 5      | While having sex, condoms are the only way to avoid pregnancy, STDs, and AIDS                   | No;               | Yes             |
| 6      | Mosquito bites may be a mediator to transmit AIDS                                               | Not sure          | No              |
| 7      | Genital herpes is a kind of sexually transmitted disease                                        |                   | Yes             |
| 8      | After a woman is pregnant, her menstruation will continue for two to three months               |                   | No              |
| 9      | Compared with ordinary abortion, painless abortion is safer                                     |                   | No              |

**Table S4.** Types of the sexual harassment experience asked in the survey

| Number | Questions                                                    | Answers |
|--------|--------------------------------------------------------------|---------|
| 1      | Being laughed at by classmates due to physical development   |         |
| 2      | Verbal sexual harassment in real life                        |         |
| 3      | Verbal sexual harassment on the Internet or on mobile phones |         |
| 4      | Forced undressing/exposure of private body parts             | Yes;    |
| 5      | Forced kissing or touching private parts                     | No      |
| 6      | Forced oral sex                                              |         |
| 7      | Forced sexual intercourse (vaginal/anus)                     |         |
